# Supplementary material for: Dissolution and reduction of cobalt ions in the polyol process using ethylene glycol: identification of the active species and its role
Source: Royal Society of Chemistry journal article supplement (doi:10.1039/c5nj00669d), 2015-01-01
Supplement: c5nj00669d1.pdf [file c5nj00669d1.pdf]

# Dissolution and Reduction of Cobalt ions in Polyol Process Using Ethylene Glycol

## - Identification of the Active Species and its Role -

*Takatoshi Matsumoto,<sup>a</sup> Kazuma Takahashi,<sup>b</sup> Keisuke Kitagishi,<sup>b</sup> Kozo Shinoda,<sup>a</sup> Jhon L. Cuya  
Huaman,<sup>b</sup> Jean Y. Piquemal,<sup>c</sup> and Jeyadevan Balachandran<sup>\* b</sup>*

<sup>a</sup> Institute of Multidisciplinary Research for Advanced Materials, Tohoku University, Sendai 980-  
8577, Japan

<sup>b</sup> Department of Material Science, The University of Shiga Prefecture, Hikone 522-8533, Japan

<sup>c</sup> ITODYS, University of Diderot, Paris, France

\*E-mail : [jeyadevan.b@mat.usp.ac.jp](mailto:jeyadevan.b@mat.usp.ac.jp)

## List of Supporting Information

|             |                                                                                                                                                                                                           |       |
|-------------|-----------------------------------------------------------------------------------------------------------------------------------------------------------------------------------------------------------|-------|
|             |                                                                                                                                                                                                           | 3     |
| Figure S1.  | (a) SCF energy surface and (b) HOMO energy surface at each conformer for the ethylene glycol at mono-anion state.                                                                                         | 3     |
| Figure S2.  | Characteristic conformers of the mono anion state derived from ethylene glycol, the rotational angles and their HOMO energies                                                                             | 4     |
| Figure S3.  | Stable conformers obtained using <b>3-D</b> as starting structure                                                                                                                                         | 5     |
| Figure S4.  | (a) SCF and (b) HOMO orbital energy surfaces for neutral state ethylene glycol obtained using <b>3-D</b> as starting structure                                                                            | 6     |
| Figure S5.  | Stable conformers obtained using <b>3-E</b> as starting structure                                                                                                                                         | 7,8   |
| Figure S6.  | (a) SCF and (b) HOMO orbital energy surfaces for neutral state ethylene glycol obtained using <b>3-E</b> as starting structure                                                                            | 9     |
| Figure S7.  | Stable conformers obtained using <b>3-F</b> as starting structure                                                                                                                                         | 10,11 |
| Figure S8.  | (a) SCF and (b) HOMO orbital energy surfaces for neutral state ethylene glycol obtained using <b>3-F</b> as starting structure                                                                            | 12    |
| Figure S9.  | XRD patterns of glycolate prepared by using (a) $\text{CoCl}_2$ and metallic Na in ethylene glycol and (b) $\text{CoCl}_2$ and NaOH                                                                       | 13    |
| Figure S10  | XRD patterns of (a) profiles obtained at different stages of the reduction reaction when $\text{Co(OH)}_2$ was heated in ethylene glycol and (b) Co nanoparticles obtained using different cobalt sources | 14    |
| Figure S11. | SEM images of metallic cobalt particles obtained using (a) $\text{CoCl}_2$ , (b) $\text{Co(OH)}_2$ , and (c) $\text{Co(OAc)}_2$ as metallic precursors in ethylene glycol.                                | 15    |

(a)

Rotational Angle2: 2-3-4-9 / degree

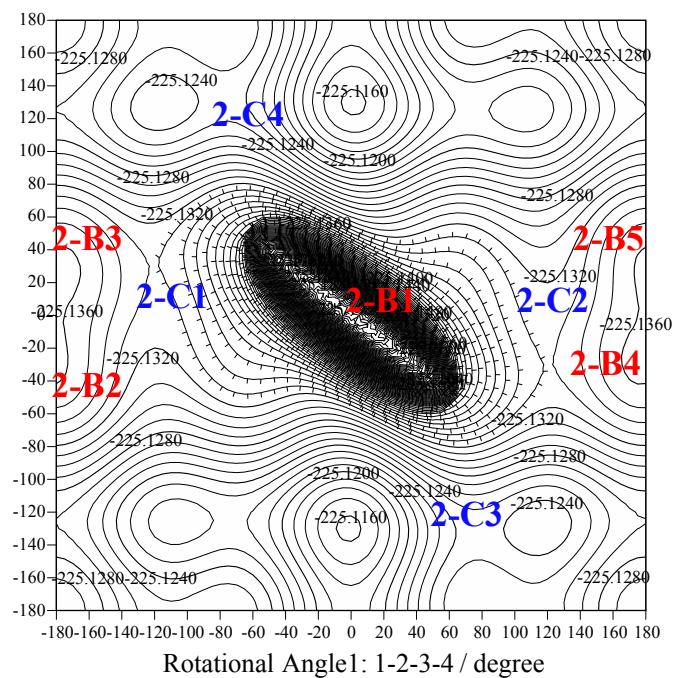

(b)

Rotational Angle2: 2-3-4-9 / degree

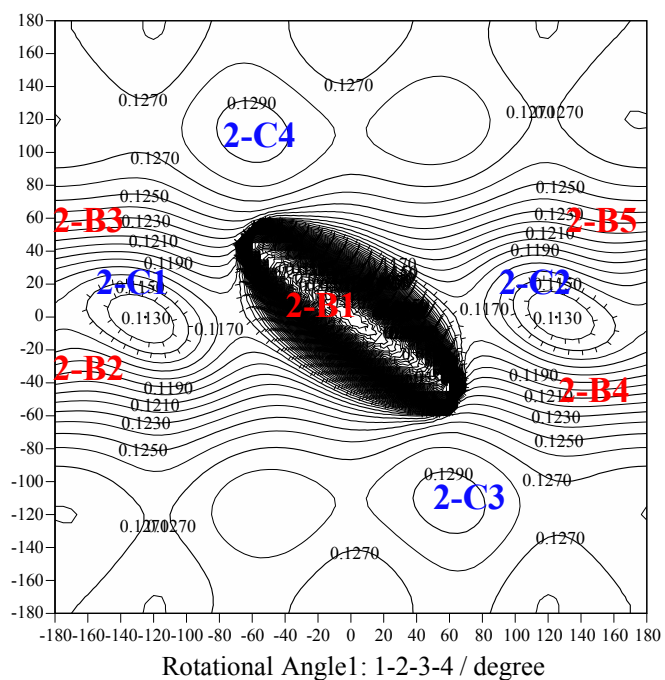

Figure S1. (a) SCF energy surface and (b) HOMO energy surface at each conformer for the ethylene glycol at mono-anion state.

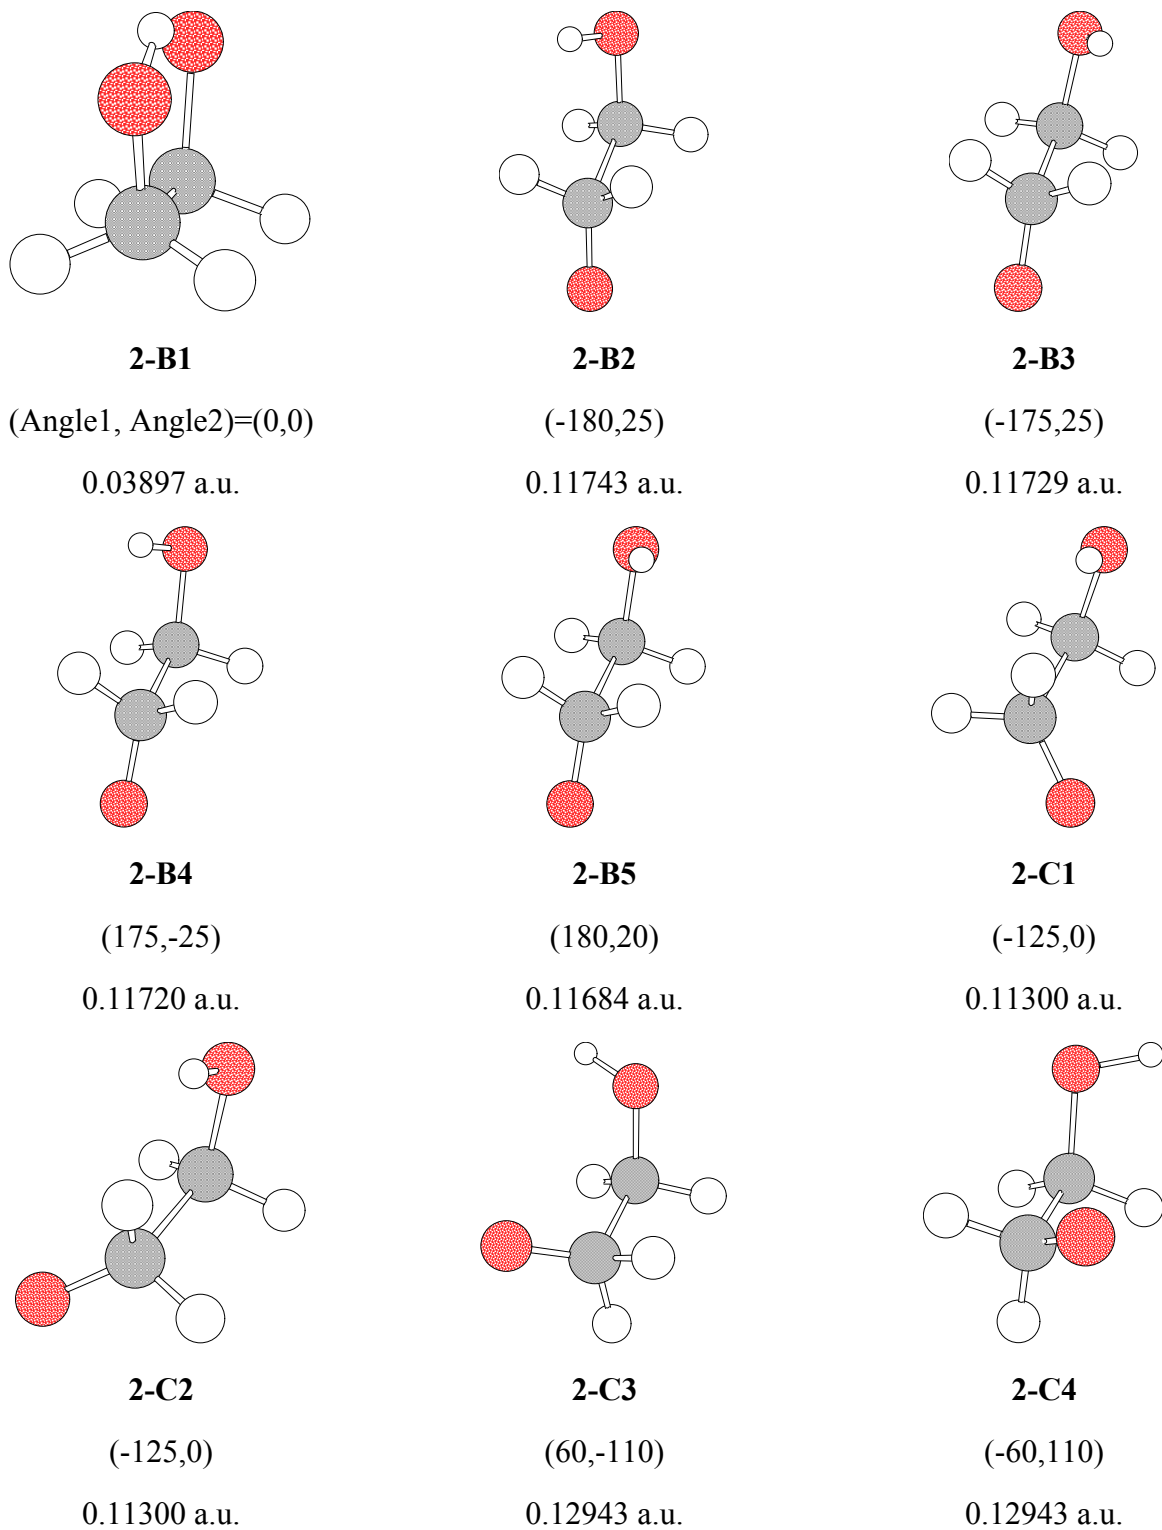

Figure S2. Characteristic conformers of the mono anion state derived from ethylene glycol, the rotational angles and their HOMO energies

<The case of the starting structure: **3-D**>

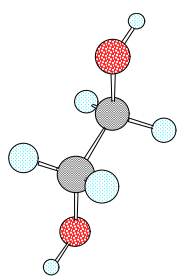

**3-D1**

(180,180)

-0.35570 a.u.

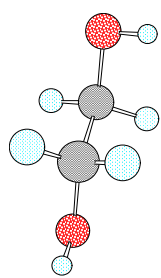

**3-D2**

(180,65)

-0.35358 a.u.

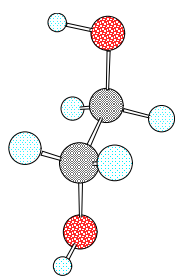

**3-D3**

(180,-65)

-0.35358 a.u.

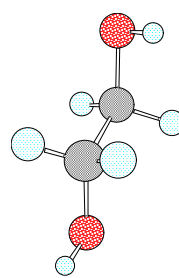

**3-D4**

(65,180)

-0.35358 a.u.

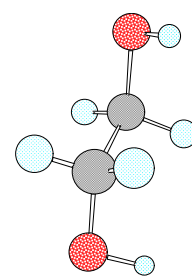

**3-D5**

(60,60)

-0.33955 a.u.

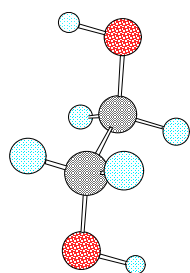

**3-D6**

(65,-65)

-0.33627 a.u.

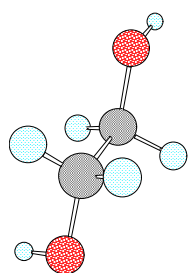

**3-D7**

(-65,180)

-0.35358 a.u.

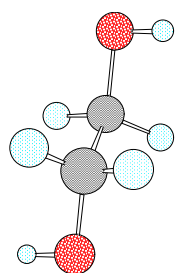

**3-D8**

(-65,65)

-0.33627 a.u.

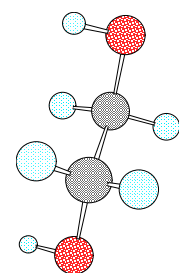

**3-D9**

(-60,-60)

-0.33955 a.u.

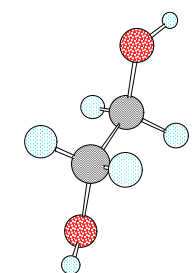

**3-D10**

(165,165)

-0.35705 a.u.

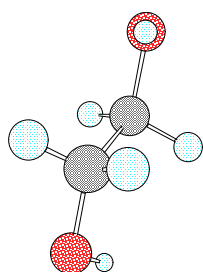

**3-D11**

(15,20)

-0.36308 a.u.

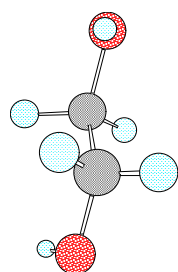

**3-D12**

(-15,-20)

-0.36308 a.u.

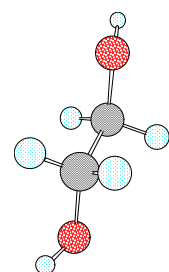

**3-D13**

(60,60)

-0.33955 a.u.

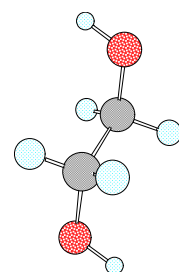

**3-D14**

(65,-65)

-0.33627 a.u.

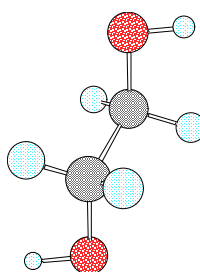

**3-D15**

(-65,180)

-0.35358 a.u.

Figure S3. Stable conformers obtained using **3-D** as starting structure

<The case of the starting structure: **3-D**>

(a)

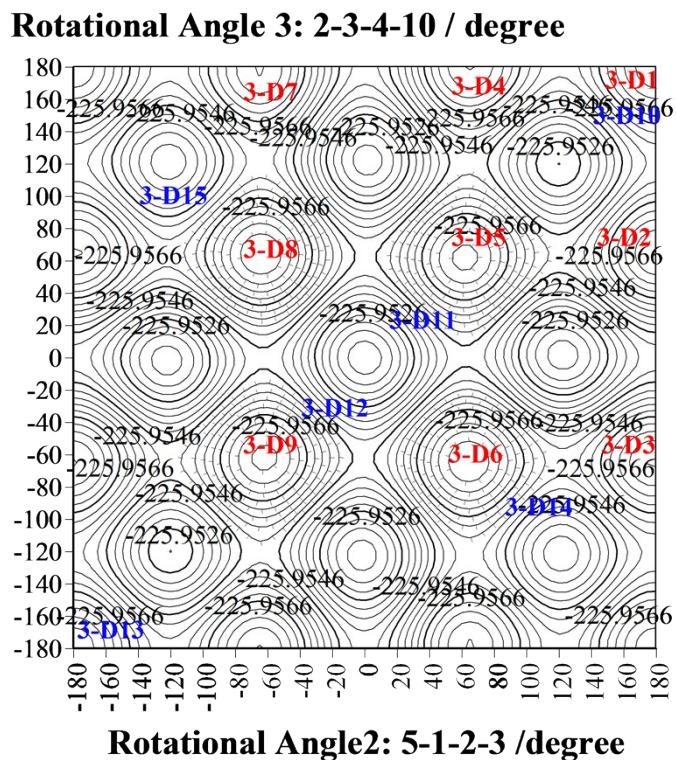

(b)

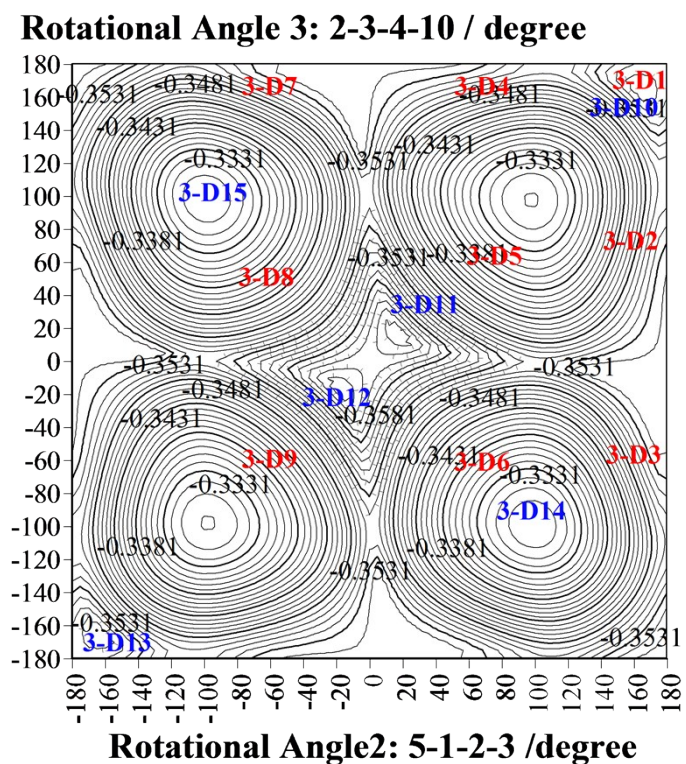

Figure S4. (a) SCF and (b) HOMO orbital energy surfaces for neutral state ethylene glycol obtained using **3-D** as starting structure

<The case of the starting structure: **3-E**>

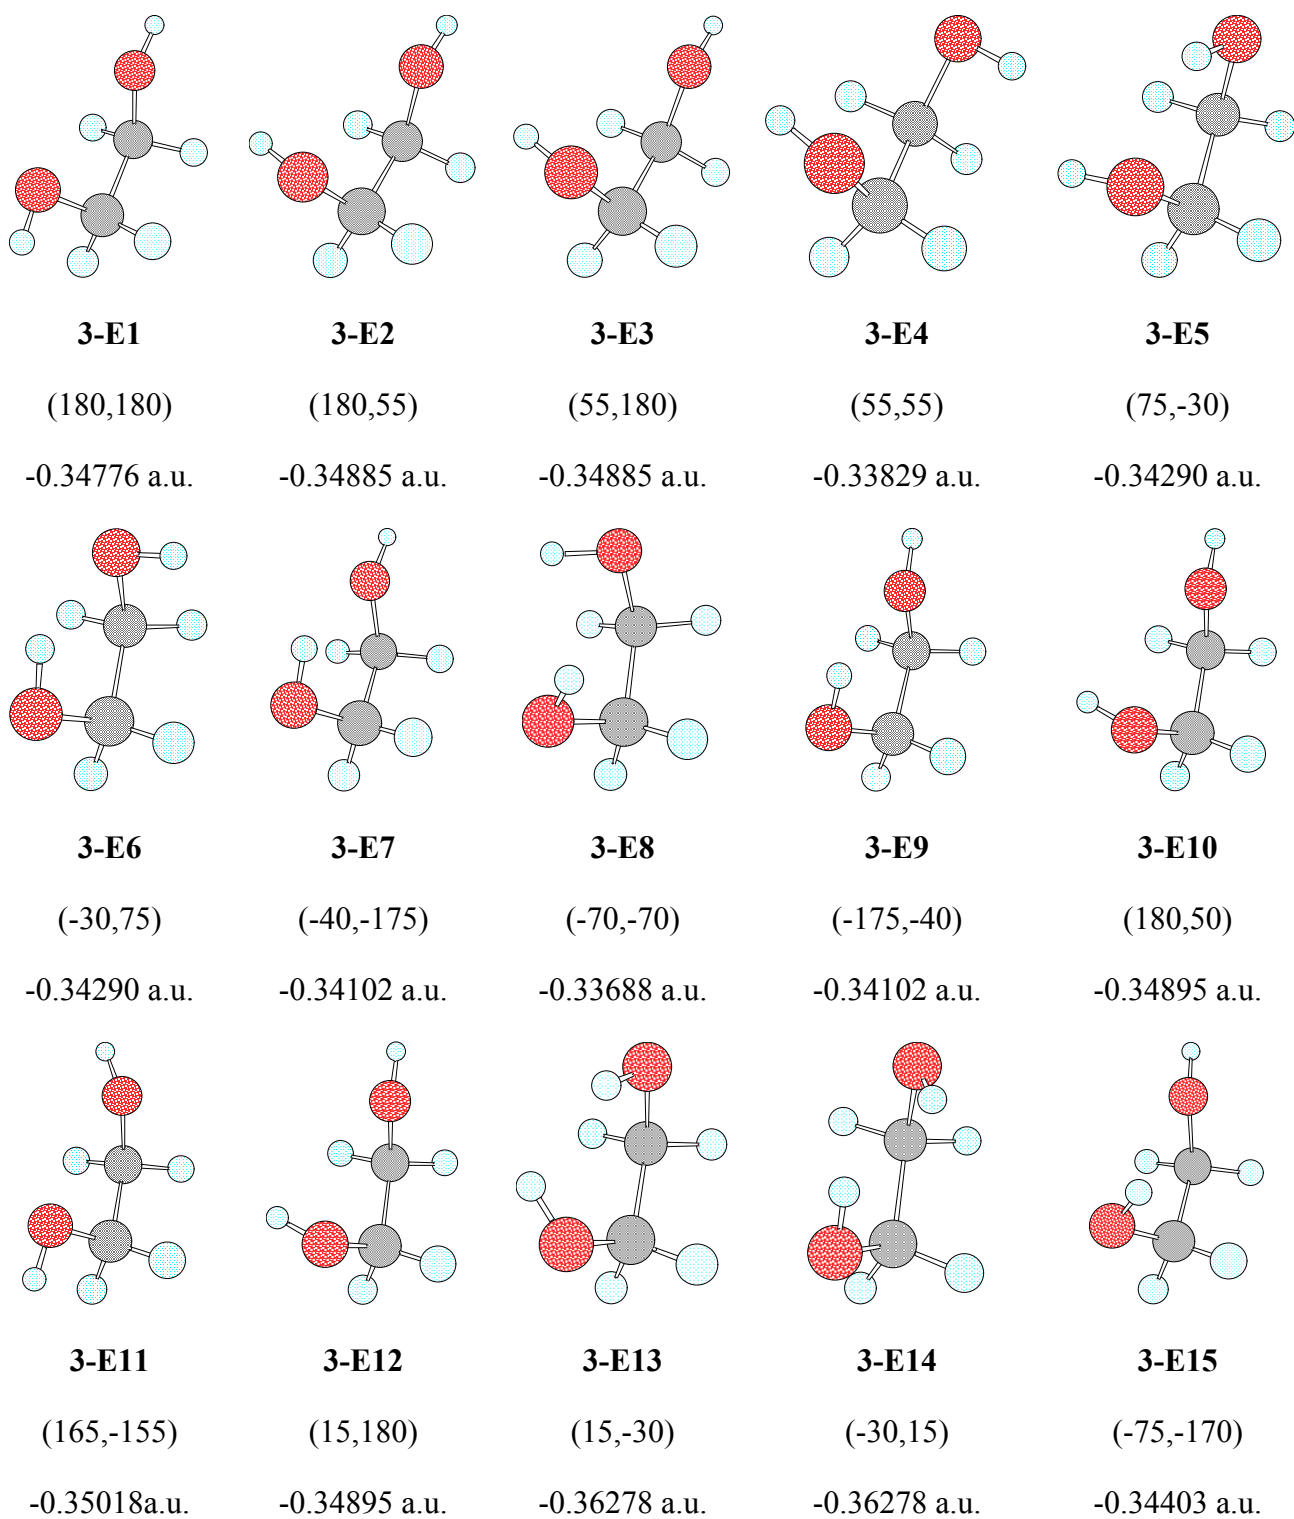

Figure S5. Stable conformers obtained using **3-E** as starting structure

<The case of the starting structure: **3-E**> (Continued)

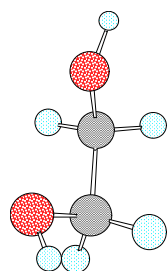

**3-E16**

(-155,165)

-0.35018 a.u.

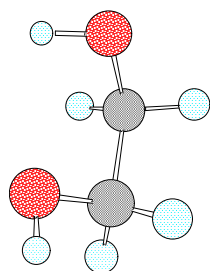

**3-E17**

(-170,-75)

-0.34403 a.u.

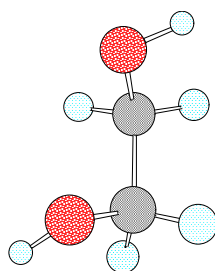

**3-E18**

(105,105)

-0.32517 a.u.

Figure S5. Stable conformers obtained using **3-E** as starting structure (Continued)





<The case of the starting structure: **3-F**>

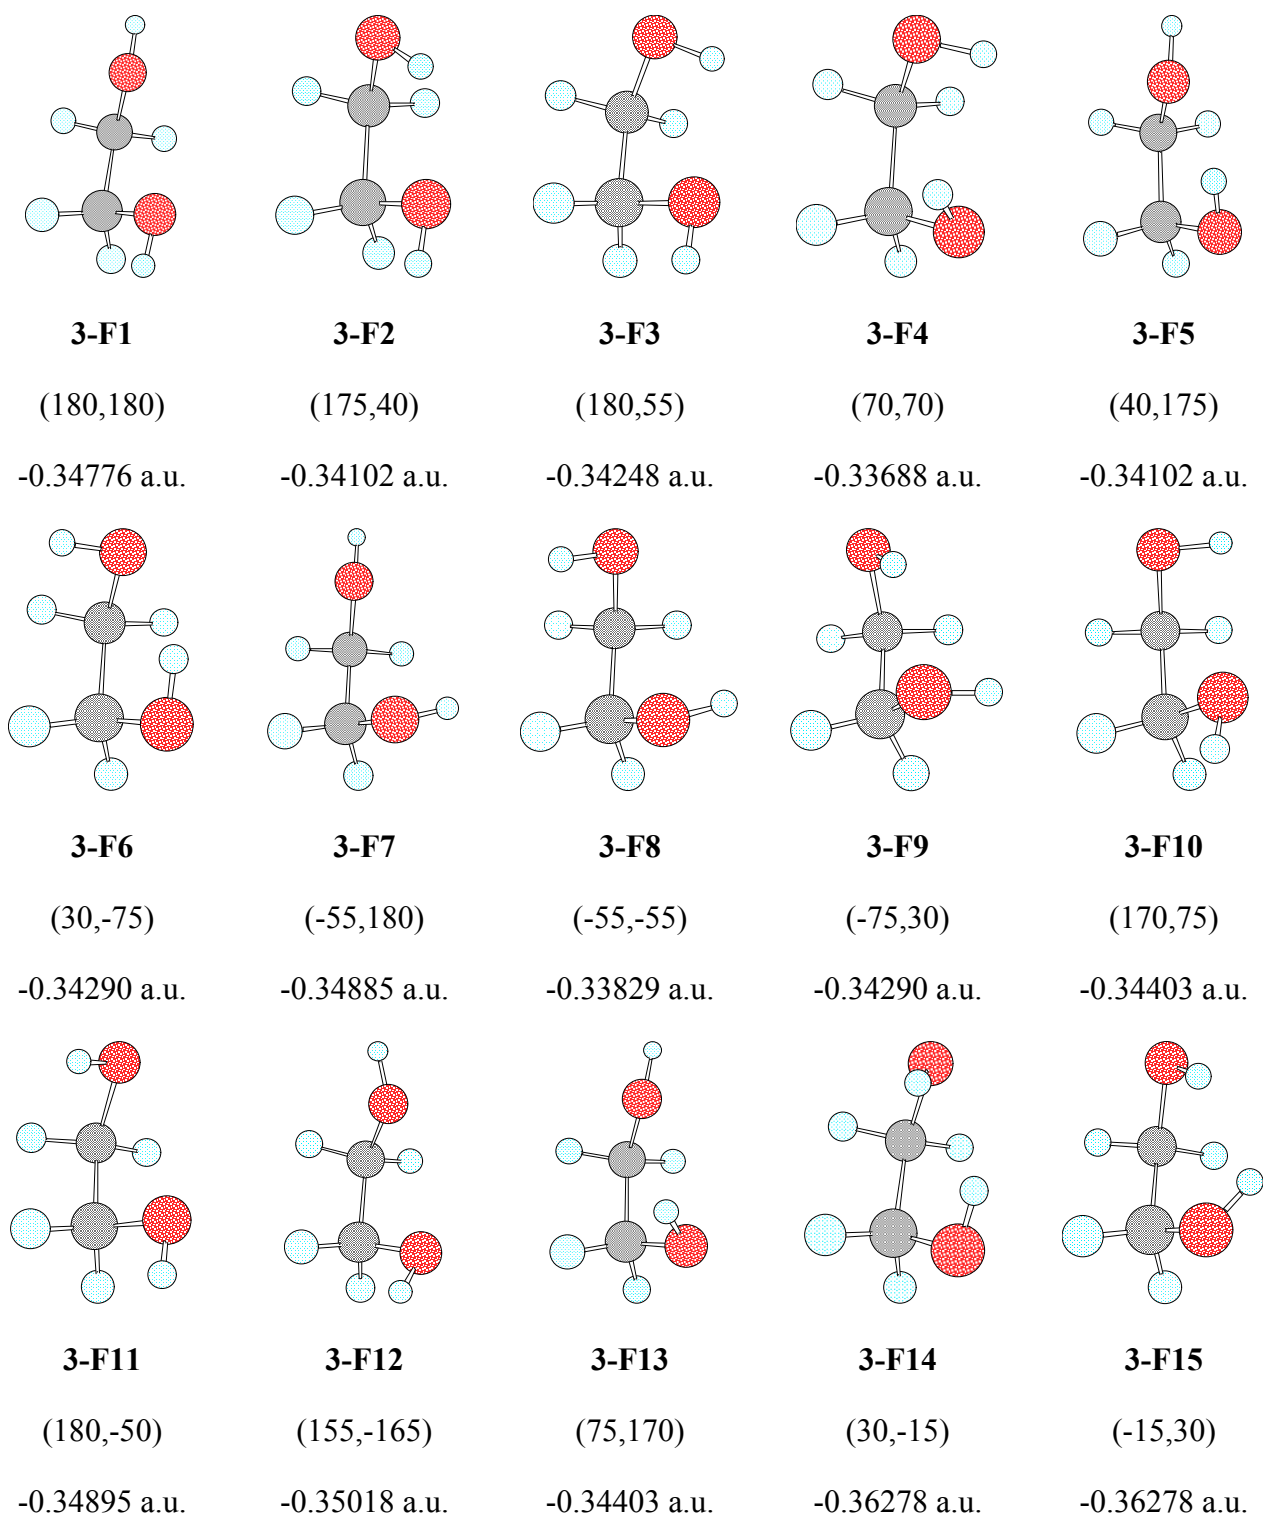

Figure S7. Stable conformers obtained using **3-F** as starting structure

<The case of the starting structure: **3-F**> (Continued)

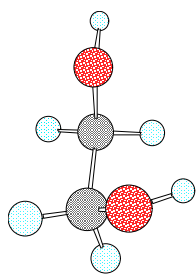

**3-F16**

(-50,180)

-0.34895 a.u.

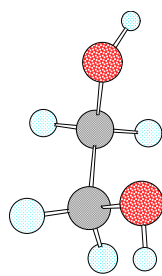

**3-F17**

(-165,155)

-0.35018 a.u.

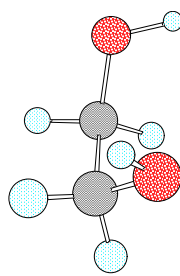

**3-F18**

(105,105)

-0.32517 a.u.

Figure S7. Stable conformers obtained using **3-F** as starting structure (Continued)



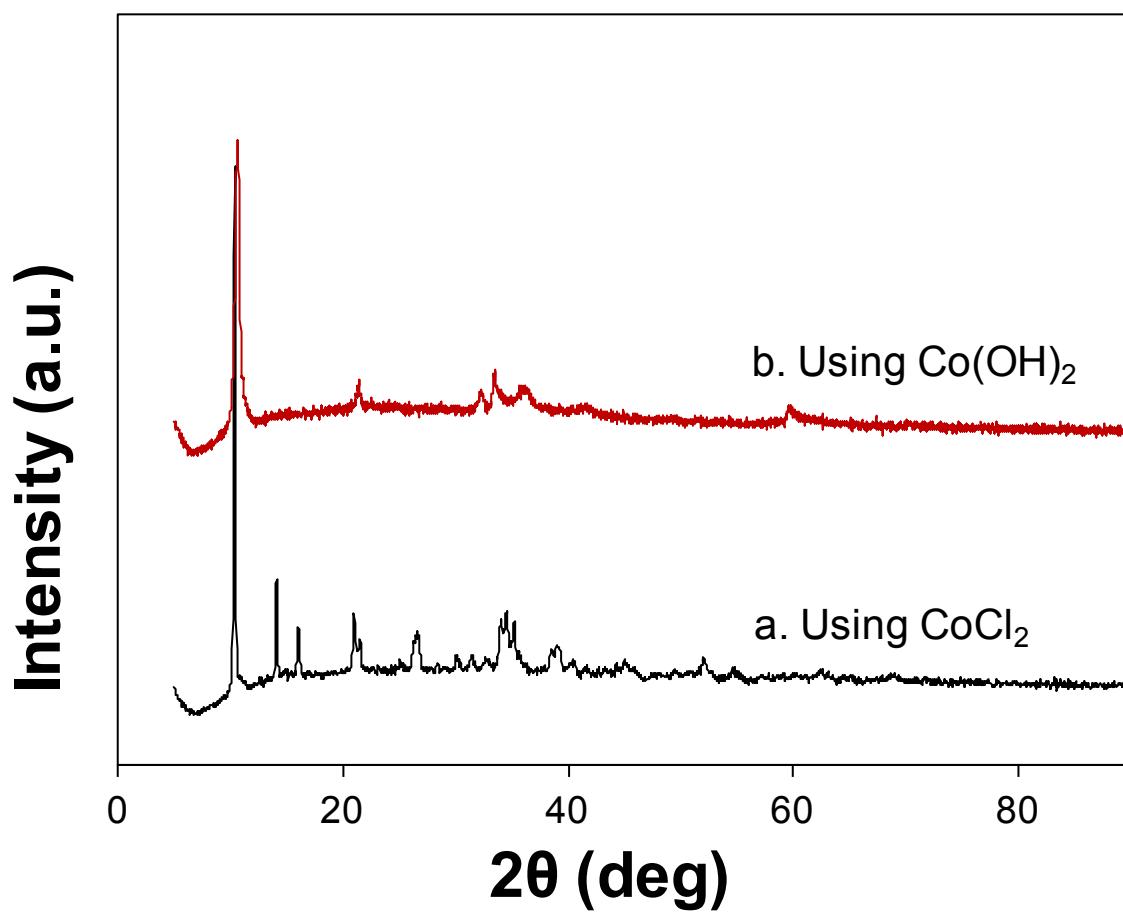

Figure S9. XRD patterns of glycolate prepared by using (a)  $\text{CoCl}_2$  and metallic Na in ethylene glycol and (b)  $\text{CoCl}_2$  and NaOH.

(a)

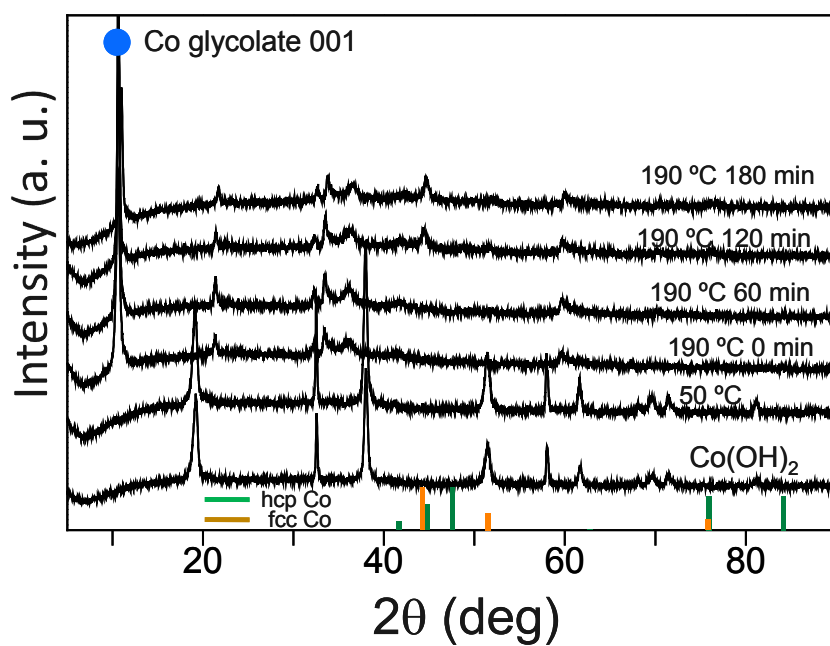

(b)

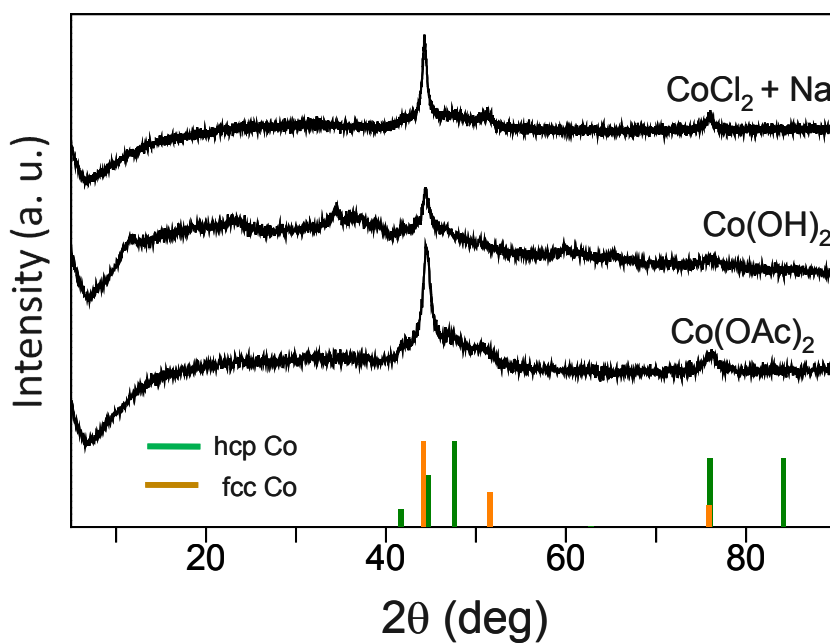

Figure S10. XRD patterns of (a) profiles obtained at different stages of the reduction reaction when Co(OH)<sub>2</sub> was heated in ethylene glycol and (b) Co nanoparticles obtained using different cobalt sources.

(a)

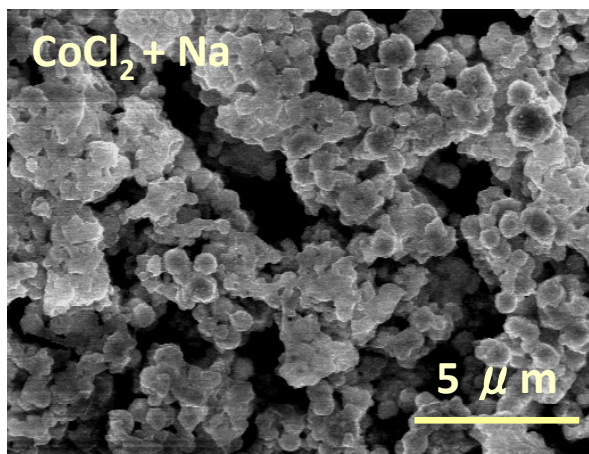

(b)

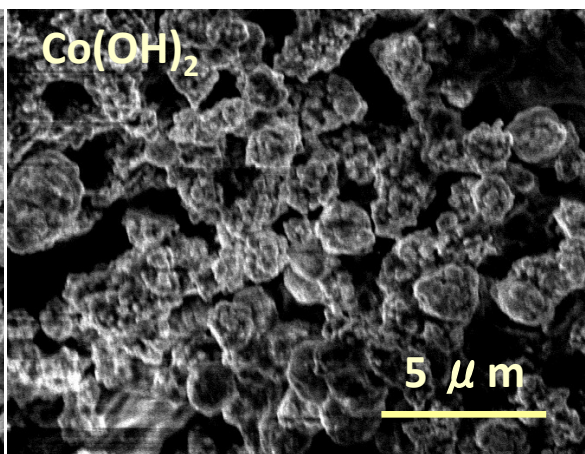

(c)

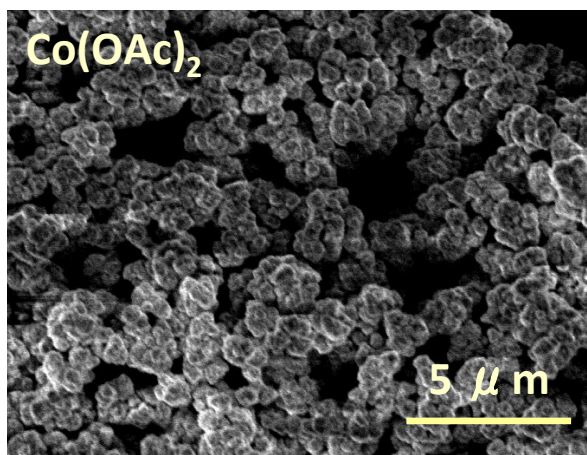

Figure S11. SEM images of metallic cobalt particles obtained using (a)  $\text{CoCl}_2$ , (b)  $\text{Co(OH)}_2$ , and (c)  $\text{Co(OAc)}_2$  as metallic precursors in ethylene glycol.
